# Supplementary material
Source: PubMed Central journal article supplement (PMC5531068)
Supplement: NIHMS874857-supplement-SupplementalFigures_Tables.pdf [file NIHMS874857-supplement-SupplementalFigures_Tables.pdf]

## Supplemental Figures and Tables

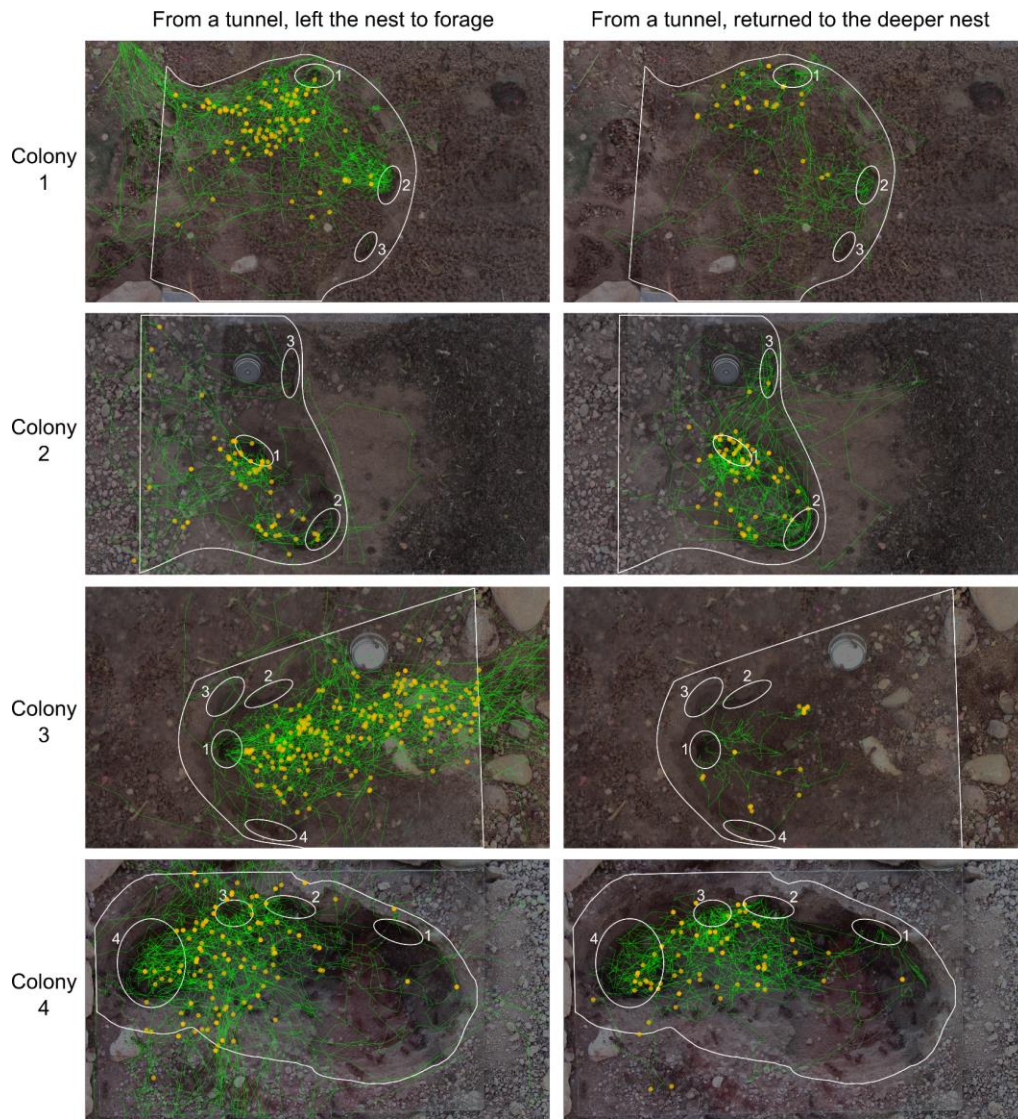

**Figure S1. The trajectories and locations of interactions of potential forager ants with returning foragers.** Trajectories are shown as green lines, and locations of interactions with returning foragers are shown as yellow dots. Ants that emerged from a tunnel and left the nest to forage are shown in the left column, and ants that emerged from a tunnel and returned to the deeper nest are shown in the right column. The numerical labels 1, 2, 3, and 4 identify the observed colony, and colony data are organized by row. White lines show the entrance chamber boundary and the locations of tunnels; numbers label each tunnel.

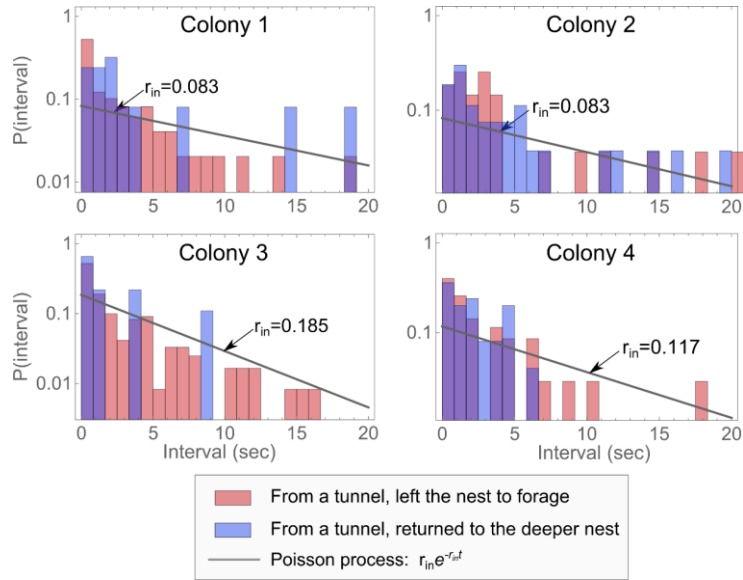

**Figure S2. The distribution of intervals between interactions that potential forager ants made with returning foragers.** Data are shown for potential foragers that emerged from a tunnel and either left the nest to forage (red) or returned to the deeper nest (blue), in comparison to a Poisson process (gray lines). The labels 1, 2, 3, and 4 identify the observed colony. The value of  $r_{in}$  is the overall average rate of interaction for the observation from a colony, i.e.  $r_{in} = \sum N / \sum T$ , where the sum is over all potential foragers from a tunnel.

| Start of trajectory             | Trajectory information<br>Action                                           | Colony label |            |            |            |
|---------------------------------|----------------------------------------------------------------------------|--------------|------------|------------|------------|
|                                 |                                                                            | 1            | 2          | 3          | 4          |
| From a tunnel                   | Left the nest to forage                                                    | 47           | 28         | 70         | 115        |
|                                 | Returned to the deeper nest                                                | 22           | 36         | 9          | 69         |
|                                 | Carrying food or unknown object                                            | 28           | 1          | 17         | 12         |
|                                 | Always in tunnel                                                           | 4            | 11         | 0          | 13         |
|                                 | Returned to the deeper nest, in shorter time than fastest outgoing forager | 4            | 0          | 2          | 0          |
|                                 | Lost during tracking                                                       | 8            | 8          | 5          | 19         |
|                                 | Uncertain trajectory (colony 1)                                            | 28           | 0          | 0          | 0          |
|                                 | <b>Total from tunnel</b>                                                   | <b>141</b>   | <b>84</b>  | <b>103</b> | <b>228</b> |
| From outside                    | Left the nest to forage                                                    | 9            | 16         | 68         | 37         |
|                                 | Returned to the deeper nest                                                | 51           | 39         | 21         | 126        |
|                                 | Lost or uncertain trajectory                                               | 10           | 13         | 5          | 16         |
|                                 | <b>Total from outside</b>                                                  | <b>70</b>    | <b>70</b>  | <b>68</b>  | <b>94</b>  |
| Few tracking points             |                                                                            | 8            | 49         | 6          | 3          |
| Other                           |                                                                            | 16           | 31         | 33         | 88         |
| <b>Total other forager ants</b> |                                                                            | <b>24</b>    | <b>80</b>  | <b>39</b>  | <b>91</b>  |
| <b>Total forager ants</b>       |                                                                            | <b>235</b>   | <b>232</b> | <b>236</b> | <b>498</b> |
| Nest maintenance workers        |                                                                            | 14           | 2          | 1          | 44         |
| <b>Total ants</b>               |                                                                            | <b>249</b>   | <b>234</b> | <b>237</b> | <b>542</b> |

**Table S1. A complete categorization of ant trajectories with total number of ants in each category.** This table includes the total number of tracked ants in each listed category that completed trajectories within the focus tracking period during which all interactions were marked. Ants labeled “From a tunnel” began their trajectory by emerging from one of the tunnels into the entrance chamber. Ants labeled “From outside” began their trajectory by entering the video frame from a direction of active colony foraging; these ants were considered to be returning foragers. Ants that “left the nest to forage” left the video frame in a direction of active colony foraging, and ants that “returned to the deeper nest” ended their trajectory by going down a tunnel. Ants were not considered to be potential foragers if they emerged from a tunnel carrying an object and thus were likely to have been engaged in nest maintenance work (“Carrying food or unknown object”), never left a tunnel area (“Always in tunnel”), or returned to the deeper nest but stayed in the entrance chamber for a time less than that of the fastest outgoing forager (“Returned to the deeper nest, in shorter time than fastest outgoing forager”). Sometimes we could not discern the path of an ant because it got lost among other ants in the video; these trajectories were labeled as “lost during tracking”. If an ant carried dirt or debris out of the nest, it was considered to be a nest maintenance worker. For colony 1, if an ant first appeared in the upper right area of the video frame, it was also considered to be a nest maintenance worker since the colony was engaged in maintenance work in this area.

For colony 1, ants that emerged from a tunnel that were not seen to be carrying dirt, but ended their trajectory near the upper right area of the video frame (which was an area of active nest maintenance) were labeled as uncertain (“Uncertain trajectory (colony 1)”). Ants with “few tracking points” either only appeared in the video frame for a very short time, often at the edge of the frame or never leaving a tunnel area, or were lost and could not be followed any further. Ants

labeled as “other” do not fall into any of the other categories, and mainly include ants that could not be followed back in time to discern where they started from. For colony 4, due to activity near the entrance chamber, the “other” category also includes ants that entered the video frame but left without ever coming into the entrance chamber area.

|                              | Colony label |           |           |           |
|------------------------------|--------------|-----------|-----------|-----------|
|                              | 1            | 2         | 3         | 4         |
| Colony ID on field site      | 242          | 25        | 868       | F         |
| Date of filming              | 8/26/2013    | 8/24/2013 | 8/21/2013 | 8/30/2014 |
| Time of day (a.m.)           | 8:25         | 9:00      | 8:50      | 9:15      |
| Focus tracking period length | 180 s        | 180 s     | 75 s      | 60 s      |

**Table S2. Video information for each colony observation.**

| Colony label | Log-likelihood for each set of logistic regression model inputs |          |             |             |
|--------------|-----------------------------------------------------------------|----------|-------------|-------------|
|              | <i>Const.</i>                                                   | <i>r</i> | <i>N, r</i> | <i>T, r</i> |
| 1            | -43.19                                                          | -40.75   | -40.49      | -40.74      |
| 2            | -43.86                                                          | -41.31   | -40.71      | -38.65      |
| 3            | -28.02                                                          | -26.16   | -25.65      | -26.16      |
| 4            | -121.73                                                         | -119.07  | -115.58     | -117.19     |

**Table S3.** Log-likelihood values from fits using different combinations of inputs to the logistic regression model. See the main text for formal model comparison.
